# Supplementary material for: Supramolecular complexation of C60 and C70 by helical nanographene incorporating N-heterotriangulene and hexabenzocoronene subunits
Source: Royal Society of Chemistry journal article supplement (doi:10.1039/d4ra07837c), 2025-01-01
Supplement: d4ra07837c1.pdf [file d4ra07837c1.pdf]

## Supramolecular complexation of C<sub>60</sub> and C<sub>70</sub> by helical nanographene incorporating N-heterotriangulene and hexabenzocoronene subunits

Marina Kinzelmann <sup>a)</sup>, Nina Fröhlich <sup>b)</sup>, Frederik Gnannt <sup>b)</sup>, Jan Borstelmann <sup>f)</sup>, Stefan Frühwald <sup>c)</sup>, Christoph Oleszak <sup>e)</sup>, Norbert Jux <sup>e)</sup>, Andreas Görling <sup>c,d)</sup>, Milan Kivala <sup>f)</sup> and Thomas Drewello <sup>\*,a)</sup>

a) Physical Chemistry I, Friedrich-Alexander-Universität Erlangen-Nürnberg, Egerlandstraße 3, 91058 Erlangen, Germany.

b) Organic Chemistry I, Friedrich-Alexander-Universität Erlangen-Nürnberg, Nikolaus-Fiebiger-Straße 10, 91058 Erlangen, Germany.

c) Theoretical Chemistry, Friedrich-Alexander-Universität Erlangen-Nürnberg, Egerlandstraße 3, 91058 Erlangen, Germany.

d) Erlangen National High Performance Computing Center (NHR@FAU), Martenstr. 1, 91058 Erlangen, Germany

e) Organic Chemistry II, Friedrich-Alexander-Universität Erlangen-Nürnberg, Nikolaus-Fiebiger-Straße 10, 91058 Erlangen, Germany.

f) Institute of Organic Chemistry, Ruprecht-Karls-University Heidelberg, Im Neuenheimer Feld 270, 69120 Heidelberg, Germany.

\* corresponding author: E-mail: [thomas.drewello@fau.de](mailto:thomas.drewello@fau.de)

## Contents

|                                                                                               |   |
|-----------------------------------------------------------------------------------------------|---|
| 1. Reference MS <sup>1</sup> Spectra .....                                                    | 2 |
| 2. Breakdown graph of (HB-HBC) <sub>2</sub> (C <sub>60</sub> ) <sup>+</sup> .....             | 3 |
| 3. MS <sup>1</sup> Spectra of NTH and C <sub>70</sub> .....                                   | 4 |
| 4. Breakdown graphs of NTH(C <sub>70</sub> ) .....                                            | 5 |
| 5. MS <sup>2</sup> Spectra of NTH(C <sub>78</sub> ) <sup>2+</sup> .....                       | 6 |
| 6. E <sub>50</sub> values of the NTH complexes with C <sub>60</sub> and C <sub>70</sub> ..... | 6 |
| 7. DFT calculations: complex structures .....                                                 | 7 |
| 8. Calculated fragmentation and ionization energies .....                                     | 8 |
| 9. Energies and cartesian coordinates of the host-guest complexes .....                       | 9 |
| 10. <sup>1</sup> H-, <sup>13</sup> C-NMR spectra and crystal structure of NTH .....           | 9 |

# 1. Reference MS<sup>1</sup> Spectra

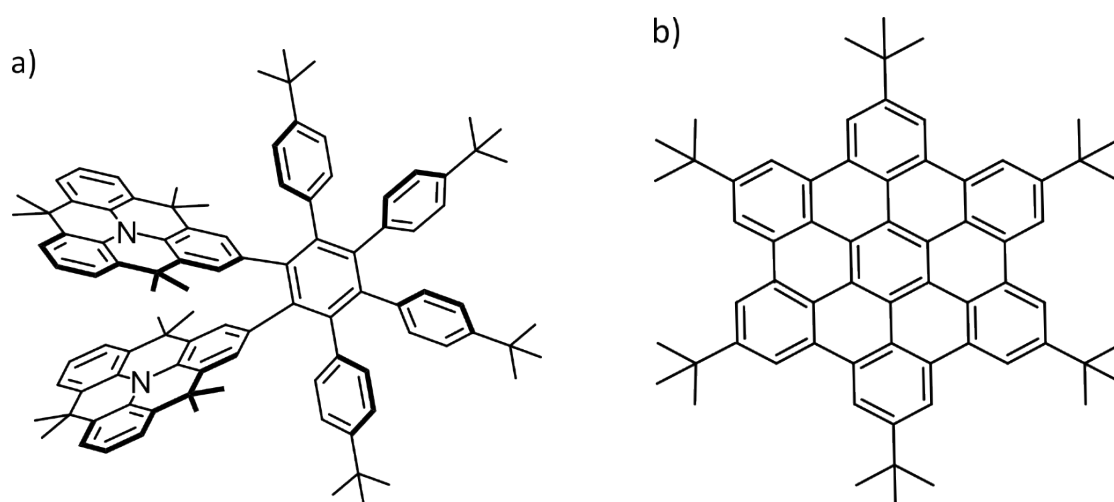

Figure S 1: Reference molecules for comparison with NTH. a) NTH precursor (M), b): hexa-tert-butyl-hexa-peri-hexabenzocoronene (HB-HBC)

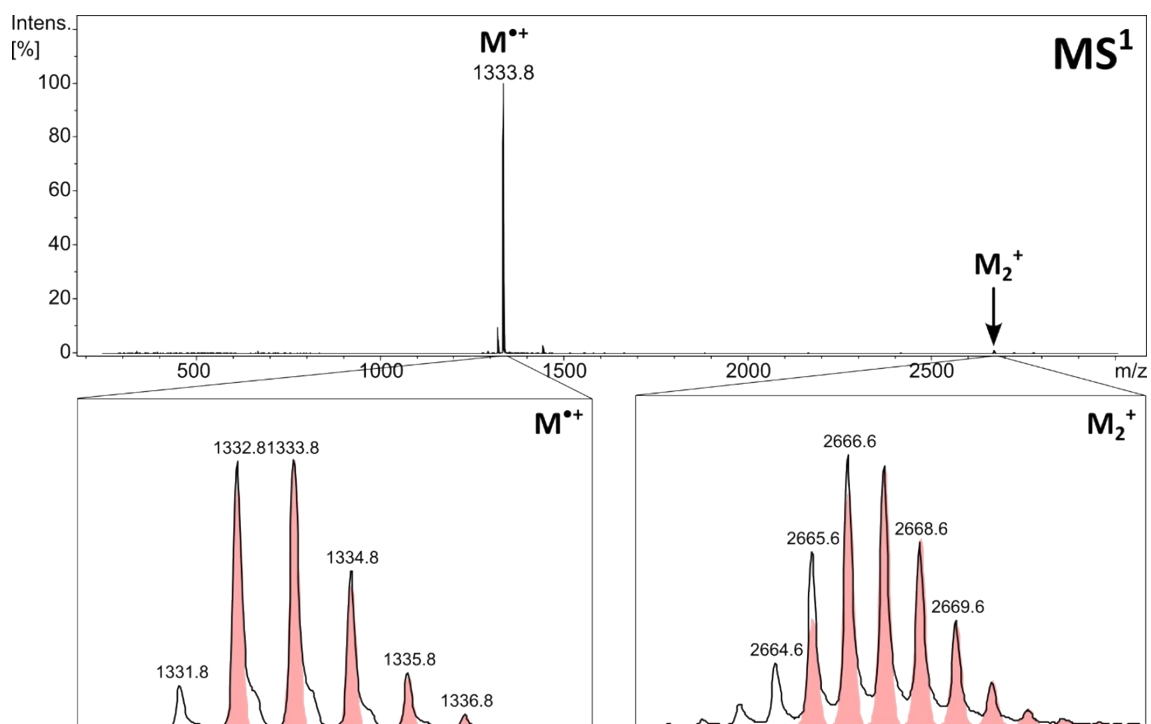

Figure S 2: MS<sup>1</sup> of the NTH precursor/C<sub>60</sub> analyte solution. No molecule-fullerene complexes could be observed.

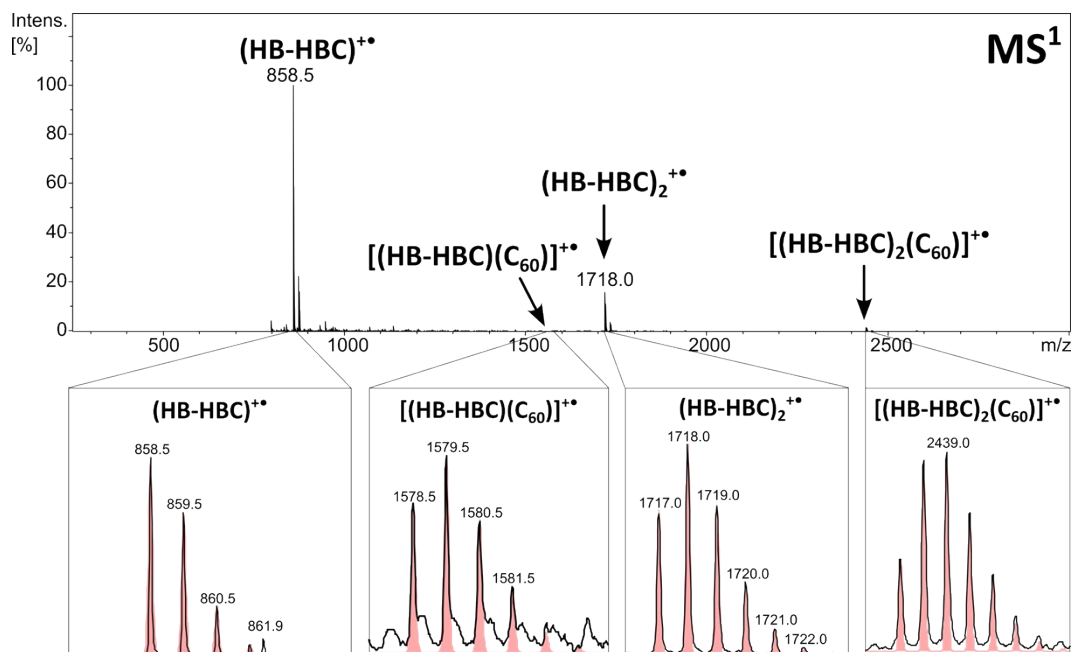

Figure S 3: MS<sup>1</sup> of the HB-HBC/C<sub>60</sub> analyte solution. Only minor amounts of [1:1] and [2:1] HB-HBC fullerene complex was observed in the experiment.

## 2. Breakdown graph of (HB-HBC)<sub>2</sub>(C<sub>60</sub>)<sup>+</sup>

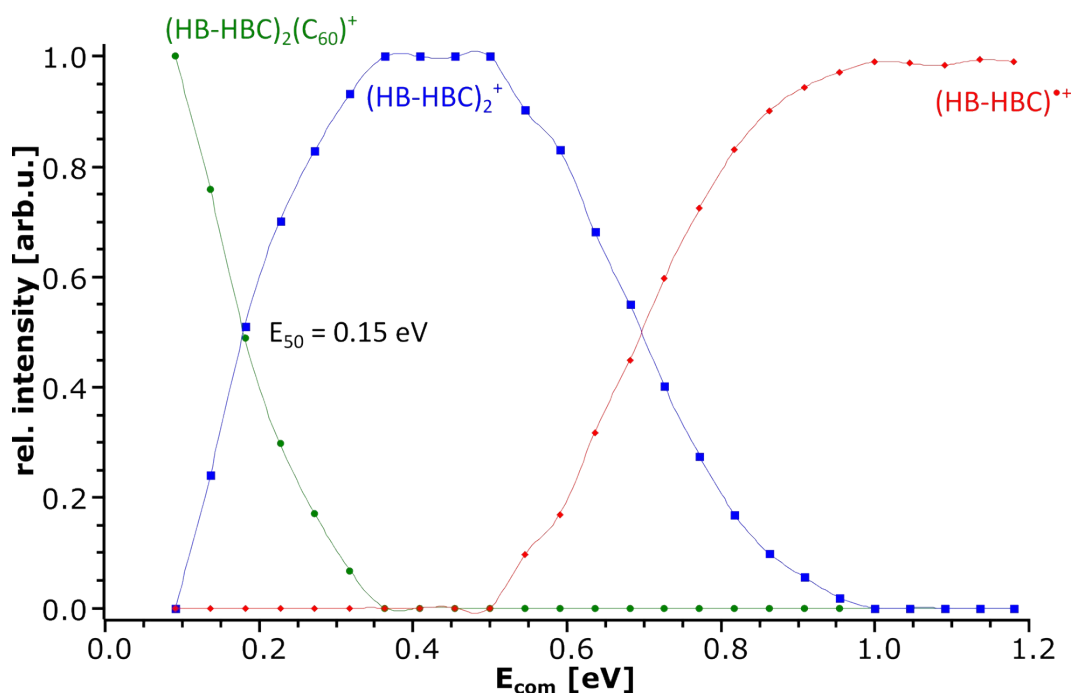

Figure S 4: Breakdown graph of the HB-HBC:C<sub>60</sub> [2:1] complex, showing the loss of neutral C<sub>60</sub> at low collision energy followed by the dissociation of the HB-HBC dimer at higher collision energy. This indicates that the C<sub>60</sub> is only loosely bound to an HB-HBC dimeric structure.

### 3. MS<sup>1</sup> Spectra of NTH and C<sub>70</sub>

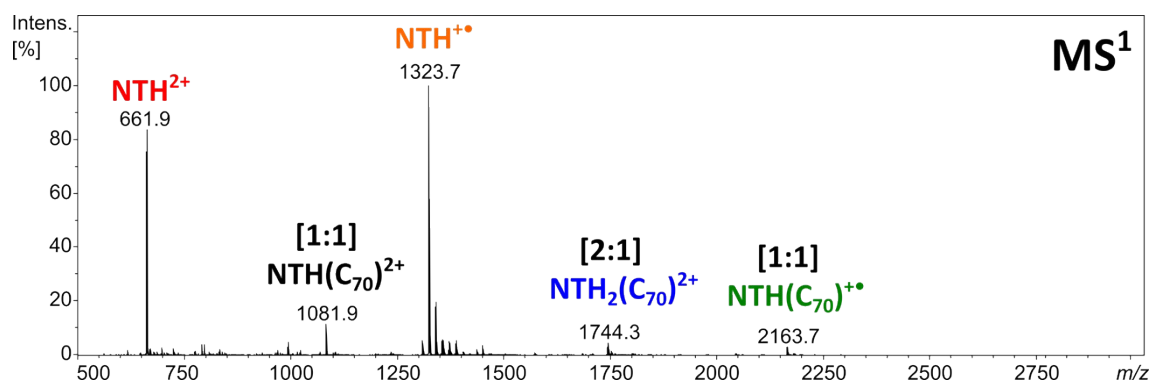

Figure S 5: MS<sup>1</sup> spectra of the NTH/C<sub>70</sub> analyte solution.

#### 4. Breakdown graphs of NTH(C<sub>70</sub>)

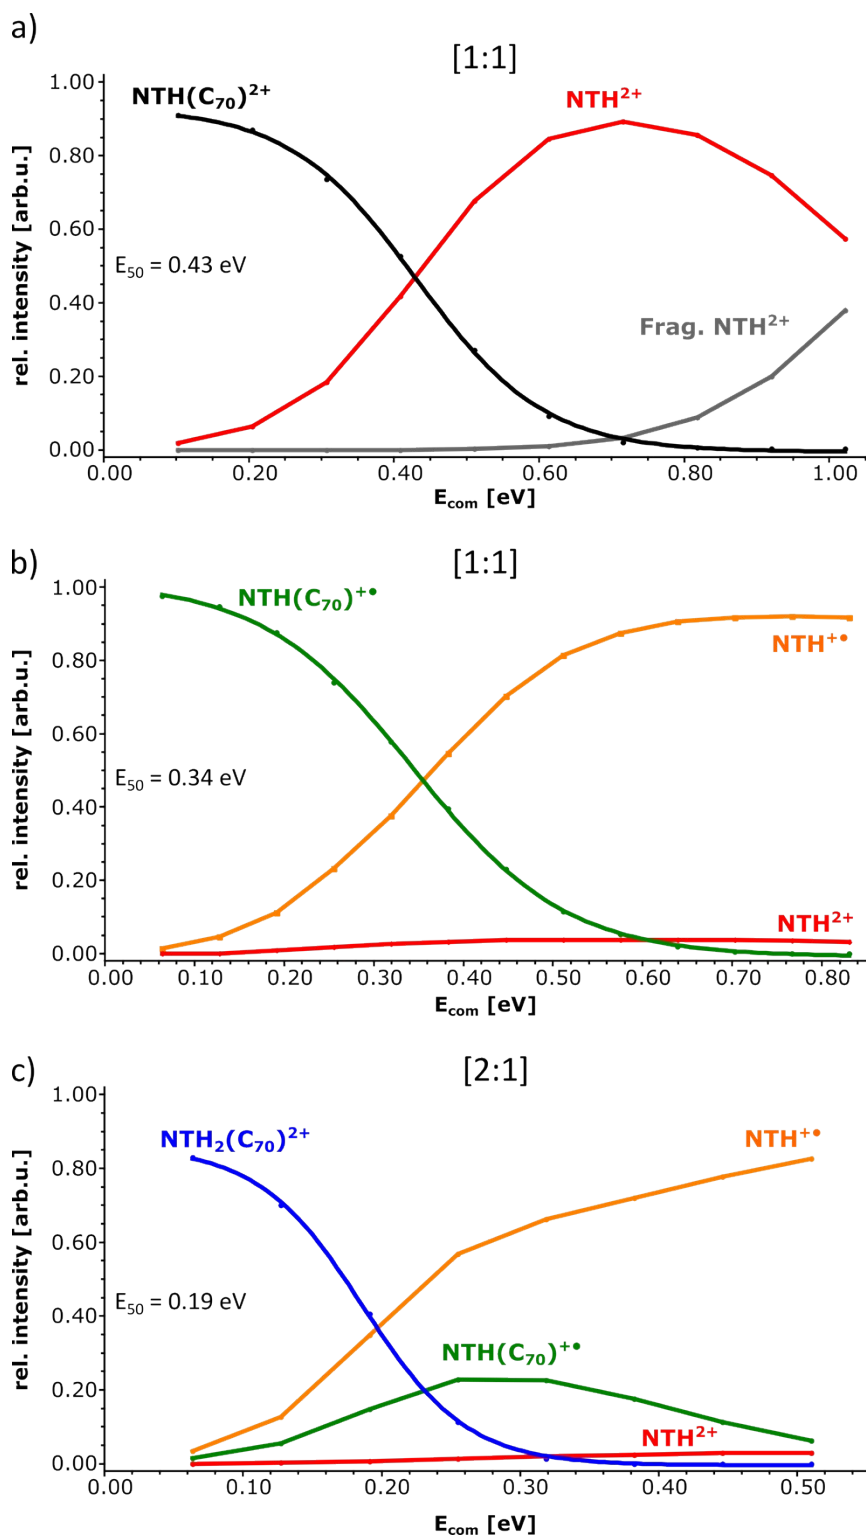

Figure S 6: Breakdown graphs of the selected NTH/C<sub>70</sub> complexes.

## 5. MS<sup>2</sup> Spectra of NTH(C<sub>78</sub>)<sup>2+</sup>

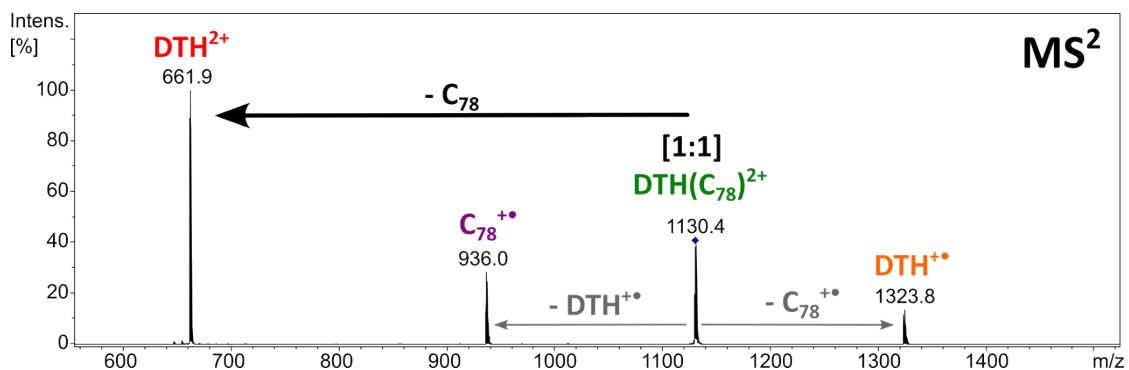

Figure S 7: MS<sup>2</sup> spectra of the doubly charged [1:1] complex of NTH and C<sub>78</sub> (m/z 1130.4). Two fragmentation processes can be observed. The loss of neutral C<sub>78</sub> (black) and the fragmentation into C<sub>78</sub><sup>+•</sup> and NTH<sup>+•</sup> (grey) indicate a charge transfer from the dicationic NTH to the fullerene.

## 6. E<sub>50</sub> values of the NTH complexes with C<sub>60</sub> and C<sub>70</sub>

Table S 1: relative stability of the observed NTH/fullerene (C<sub>60</sub> and C<sub>70</sub>) complexes in eV

| E <sub>50</sub> in [eV] | [1:1]<br>NTH(C <sub>60/70</sub> ) <sup>2+</sup> | [1:1]<br>NTH(C <sub>60/70</sub> ) <sup>+</sup> | [2:1]<br>NTH <sub>2</sub> (C <sub>60/70</sub> ) <sup>2+</sup> | [1:2]<br>NTH(C <sub>60/70</sub> ) <sub>2</sub> <sup>+</sup> | [2:3]<br>NTH <sub>2</sub> (C <sub>60/70</sub> ) <sub>3</sub> <sup>2+</sup> |
|-------------------------|-------------------------------------------------|------------------------------------------------|---------------------------------------------------------------|-------------------------------------------------------------|----------------------------------------------------------------------------|
| <b>C<sub>60</sub></b>   | 0.31                                            | 0.28                                           | 0.15                                                          | 0.18                                                        | 0.18                                                                       |
| <b>C<sub>70</sub></b>   | 0.43                                            | 0.34                                           | 0.19                                                          | ---                                                         | ---                                                                        |

## 7. DFT calculations: complex structures

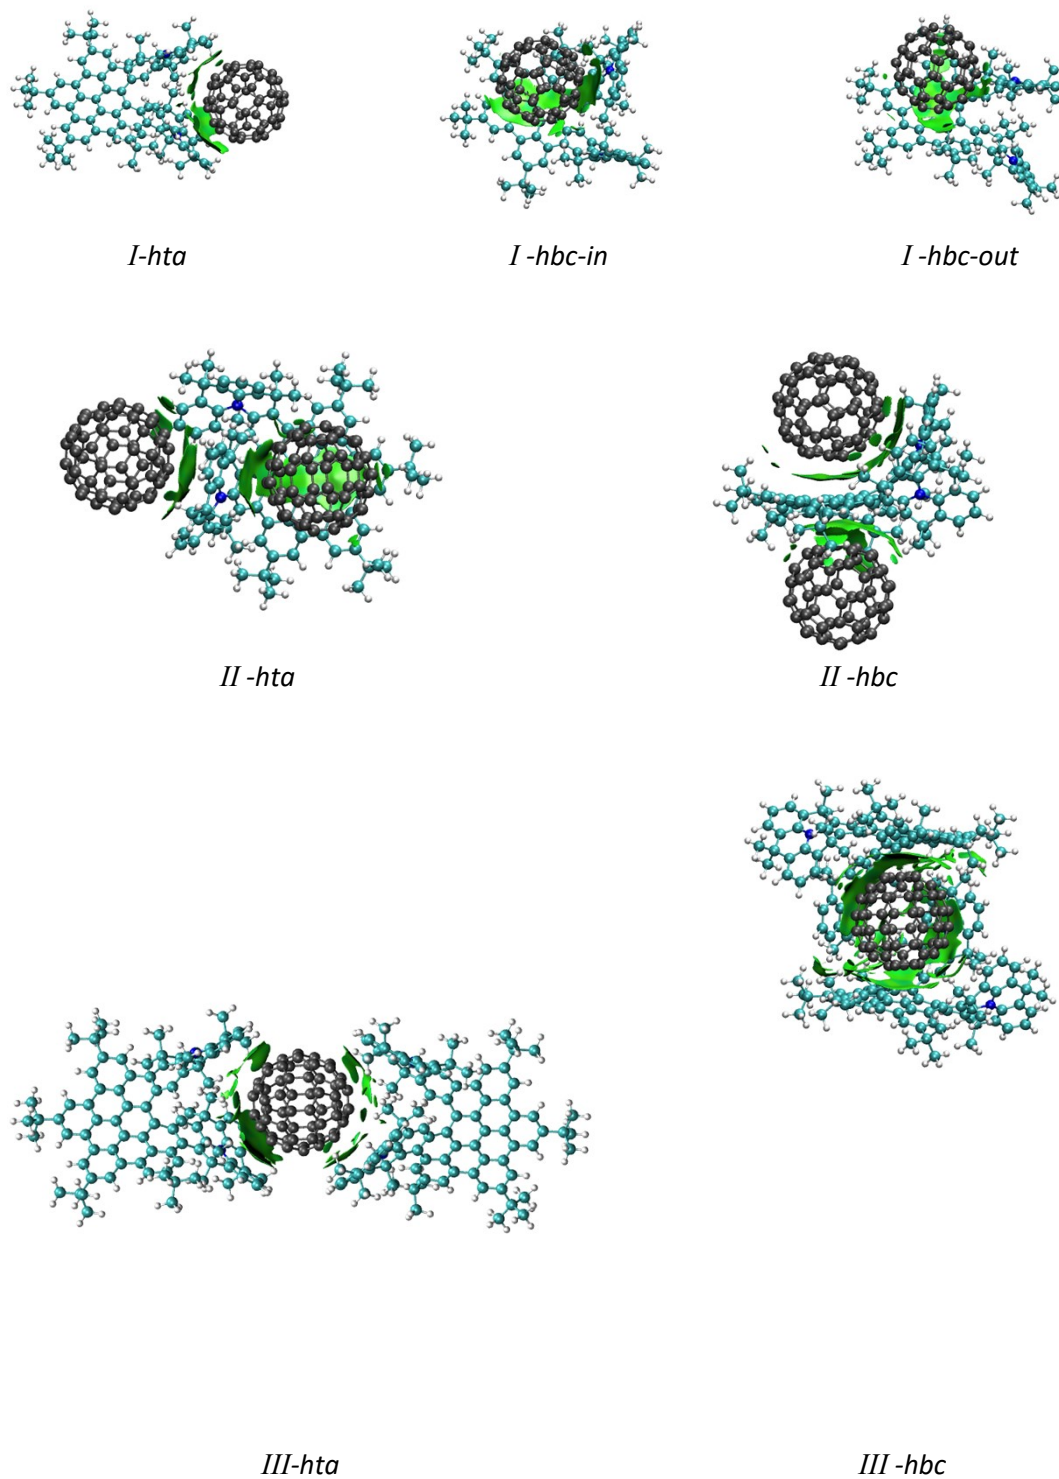

Figure S 8: structures for the [1:1] (top), [1:2] (middle) and [2:1] (bottom) NTH/C<sub>60</sub> complexes.

## 8. Calculated fragmentation and ionization energies

Table S 2: Fragmentation energies of NTH/C<sub>60</sub> [1:1] complexes in eV

| [1:1]<br>NTH / C <sub>60</sub> | Neutral             | Monocation                        |                                  | Dication                                       |                                    |
|--------------------------------|---------------------|-----------------------------------|----------------------------------|------------------------------------------------|------------------------------------|
|                                | NTH/C <sub>60</sub> | NTH <sup>+</sup> /C <sub>60</sub> | NTH/C <sub>60</sub> <sup>+</sup> | NTH <sup>+</sup> /C <sub>60</sub> <sup>+</sup> | NTH <sup>2+</sup> /C <sub>60</sub> |
| <i>I-hta</i>                   | 0.90                | 0.88                              | 2.95                             | 0.79                                           | 0.96                               |
| <i>I-hbc-in</i>                | 1.16                | 1.14                              | 3.20                             | 1.05                                           | 1.22                               |
| <i>I-hbc-out</i>               | 1.08                | 1.07                              | 3.13                             | 0.45                                           | 0.63                               |

Table S 3: Fragmentation energies of NTH/C<sub>60</sub> [2:1] complexes in eV

| [2:1]<br>NTH / C <sub>60</sub> | Neutral                     | Monocation                               |                                          |                                                       | Dication                                              |                                           |
|--------------------------------|-----------------------------|------------------------------------------|------------------------------------------|-------------------------------------------------------|-------------------------------------------------------|-------------------------------------------|
|                                | NTH / NTH / C <sub>60</sub> | NTH <sup>+</sup> / NTH / C <sub>60</sub> | NTH / NTH / C <sub>60</sub> <sup>+</sup> | NTH <sup>+</sup> / NTH / C <sub>60</sub> <sup>+</sup> | NTH <sup>+</sup> / NTH <sup>+</sup> / C <sub>60</sub> | NTH <sup>2+</sup> / NTH / C <sub>60</sub> |
| <i>II-hta</i>                  | 1.72                        | 2.15                                     | 4.22                                     | 2.33                                                  | 0.26                                                  | 2.50                                      |
| <i>II-hbc</i>                  | 3.24                        | 3.52                                     | 5.18                                     | 3.50                                                  | 1.44                                                  | 3.67                                      |

Table S 4: Fragmentation energies of NTH/C<sub>60</sub> [1:2] complexes in eV

| [1:2]<br>NTH / C <sub>60</sub> | Neutral                                 | Monocation                                           |                                                      | Dication                                                          |                                                       |                                                                   |
|--------------------------------|-----------------------------------------|------------------------------------------------------|------------------------------------------------------|-------------------------------------------------------------------|-------------------------------------------------------|-------------------------------------------------------------------|
|                                | NTH / C <sub>60</sub> / C <sub>60</sub> | NTH <sup>+</sup> / C <sub>60</sub> / C <sub>60</sub> | NTH / C <sub>60</sub> <sup>+</sup> / C <sub>60</sub> | NTH <sup>+</sup> / C <sub>60</sub> <sup>+</sup> / C <sub>60</sub> | NTH <sup>2+</sup> / C <sub>60</sub> / C <sub>60</sub> | NTH / C <sub>60</sub> <sup>+</sup> / C <sub>60</sub> <sup>+</sup> |
| <i>III-hta</i>                 | 1.97                                    | 1.91                                                 | 3.97                                                 | 1.30                                                              | 1.47                                                  | 3.36                                                              |
| <i>III-hbc</i>                 | 2.20                                    | 2.18                                                 | 4.24                                                 | 1.67                                                              | 1.84                                                  | 3.73                                                              |

We estimated the BSSE error for the fragmentation energies of the neutral DTH/C<sub>60</sub> complex (Table S2, first column) using the counterpoise (CP) correction method. We obtain:

*I-hta*: CP correction = -0.05 eV

*I-hbc-in*: CP correction = -0.06 eV

*I-hbc-out*: CP correction = -0.05 eV

Thus, the CP correction yields a nearly uniform shift of the fragmentation energies, and the relative stabilities of the complexes are unaffected.

Table S 5: Calculated vertical ionization energies (PBE/def2-TZVP)

|                       | Ionisation energy         |
|-----------------------|---------------------------|
| NTH                   | <sup>1</sup> IE = 5.33 eV |
| NTH                   | <sup>2</sup> IE = 7.49 eV |
| C <sub>60</sub>       | <sup>1</sup> IE = 7.32 eV |
| C <sub>70</sub>       | <sup>1</sup> IE = 7.24 eV |
| C <sub>78</sub> (D3)  | <sup>1</sup> IE = 6.63 eV |
| C <sub>78</sub> (D3h) | <sup>1</sup> IE = 6.93 eV |
| C <sub>78</sub> (D2v) | <sup>1</sup> IE = 6.88 eV |



## 9. Energies and cartesian coordinates of the host-guest complexes

The calculated structures and energies (in Hartrees) can be found at:

<https://doi.org/10.5281/zenodo.14534357>

## 10. $^1\text{H}$ -, $^{13}\text{C}$ -NMR spectra and crystal structure of NTH

**Nuclear Magnetic Resonance.**  $^1\text{H}$ - and  $^{13}\text{C}$ -NMR spectra were recorded on a Bruker Avance 600 (Bruker, 601 MHz, for  $^1\text{H}$ , 151 MHz for  $^{13}\text{C}$ ) spectrometer. Chemical shifts ( $\delta$ ) are reported in ppm and were referenced to the residual solvent signal as an internal reference ( $(\text{CD}_3)_2\text{CO}$ : 2.05 ppm for  $^1\text{H}$ , 206.26 and 29.84 ppm for  $^{13}\text{C}$ ). Coupling constants ( $J$ ) are given in Hz as observed and the apparent resonance multiplicity is reported as s (singlet), d (doublet), t (triplet), or m (multiplet). All signals of solvents and impurities are assigned according to literature.<sup>[1]</sup> All spectra were recorded at ambient probe temperature if not otherwise stated.

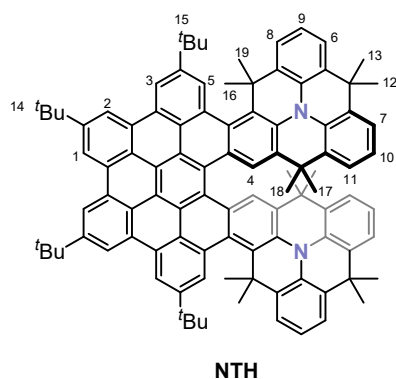

### **N-Heterotriangulene [5]helicene (NTH).**

$^1\text{H}$  NMR (600 MHz,  $(\text{CD}_3)_2\text{CO}$ )  $\delta$  9.38 (s, 2H, H<sup>1</sup>), 9.33 (s, 2H, H<sup>2</sup>), 9.24 (s, 2H, H<sup>3</sup>), 8.82 (s, 2H, H<sup>4</sup>), 8.30 (s, 2H, H<sup>5</sup>), 7.78 (dd,  $J$  = 7.6, 1.2 Hz, 2H, H<sup>6</sup>), 7.71 (td,  $J$  = 7.7, 1.3 Hz, 4H, H<sup>7</sup>, H<sup>8</sup>), 7.50 (t,  $J$  = 7.5 Hz, 2H, H<sup>9</sup>), 7.30 (t,  $J$  = 7.5 Hz, 2H, H<sup>10</sup>), 7.04 (dd,  $J$  = 7.5, 1.2 Hz, 2H, H<sup>11</sup>), 1.91 (s, 6H, H<sup>12</sup>), 1.88 (s, 6H, H<sup>13</sup>), 1.82 (s, 18H, H<sup>14</sup>), 1.72 (s, 18H, H<sup>15</sup>), 1.66 (s, 6H, H<sup>16</sup>), 1.33 (s, 6H, H<sup>17</sup>), 1.03 (s, 6H, H<sup>18</sup>), 0.78 (s, 6H, H<sup>19</sup>) ppm.

$^{13}\text{C}$  NMR (151 MHz,  $(\text{CD}_3)_2\text{CO}$ )  $\delta$  150.6, 146.5, 141.3, 134.1, 132.3, 131.94, 131.86, 131.85, 131.7, 131.4, 131.1, 130.7, 129.6, 128.7, 128.4, 127.4, 126.8, 126.3, 126.0, 125.1, 125.0, 124.7, 124.1, 123.9, 123.6, 123.5, 123.1, 121.44, 121.36, 120.1, 120.5, 119.9, 119.7, 41.0, 36.5, 36.2, 36.1, 35.90, 35.87, 35.8, 34.3, 34.2, 32.3, 32.1, 30.4, 24.4 ppm.

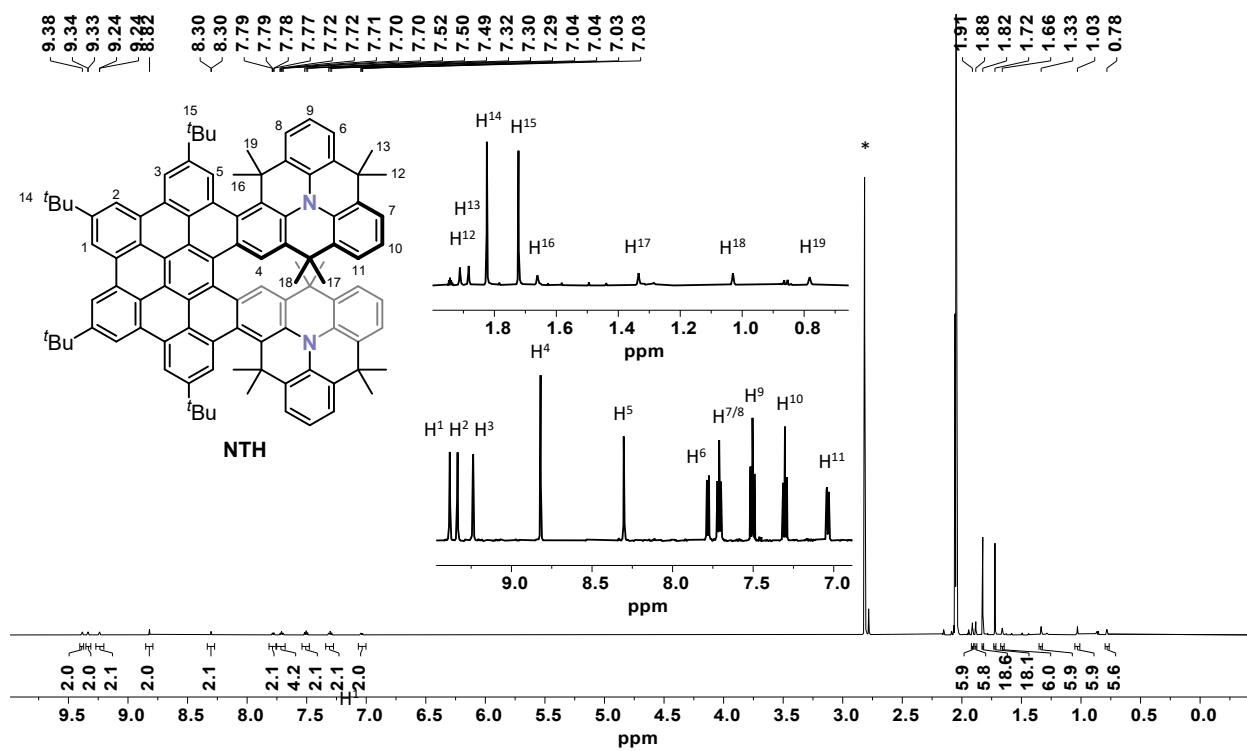

Figure S9:: <sup>1</sup>H NMR spectrum (601 MHz, (CD<sub>3</sub>)<sub>2</sub>CO) of NTH; \* H<sub>2</sub>O.

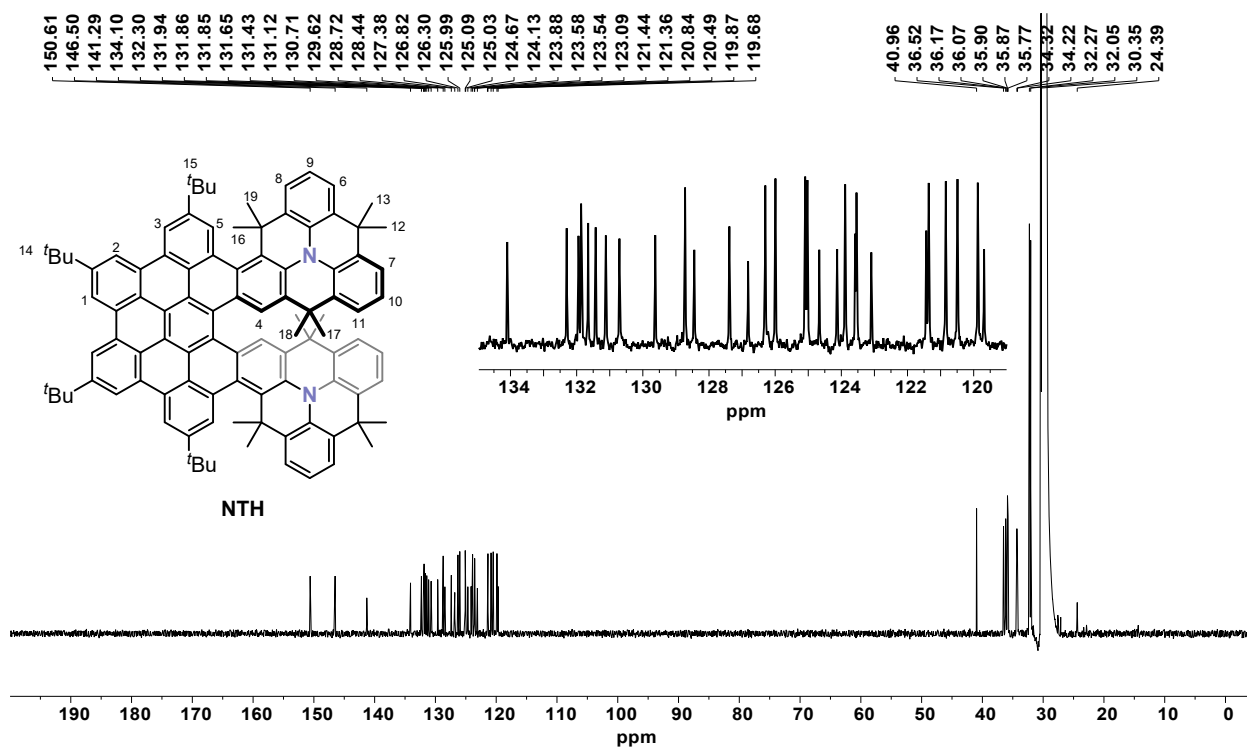

**Figure S10:** <sup>13</sup>C NMR spectrum (151 MHz, (CD<sub>3</sub>)<sub>2</sub>CO) of **NTH**.

[1] H. E. Gottlieb, V. Kotlyar, A. Nudelman, *J. Org. Chem.* **1997**, *62*, 7512.

Deposition number CCDC 2406553 contains the supplementary crystallographic data for **NTH**. The data can be obtained free of charge from The Cambridge Crystallographic Data Centre via [www.ccdc.cam.ac.uk/structures](http://www.ccdc.cam.ac.uk/structures).
